# Supplementary material for: The DNA/RNA helicase DHX9 contributes to the transcriptional program of the androgen receptor in prostate cancer
Source: PubMed Central journal article supplement (PMC9118622; doi:10.1186/s13046-022-02384-4), 2022-05-19

# Supplementary Figure 1. *DHX9* depletion affects tumorigenic phenotype in PC-3 cells.

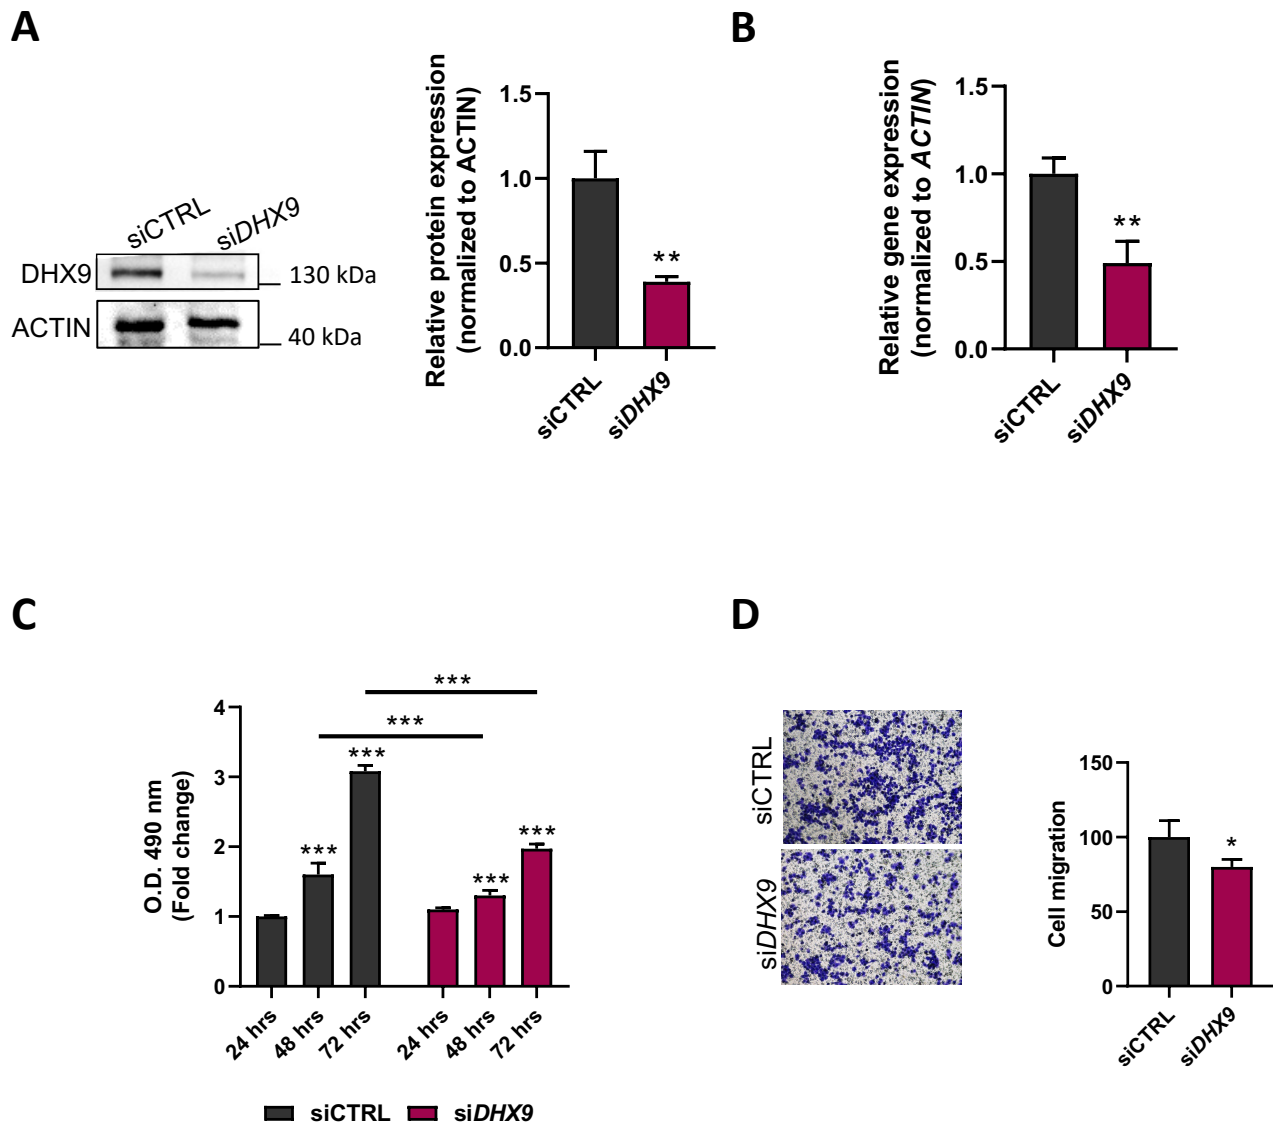

# Supplementary Figure 2. *DHX9* depletion affects tumorigenic phenotype in LNCaP cells.

**A**

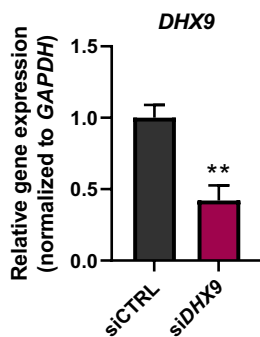

**B**

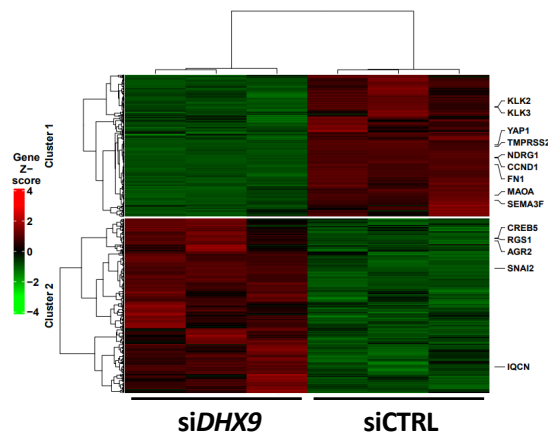

**C**

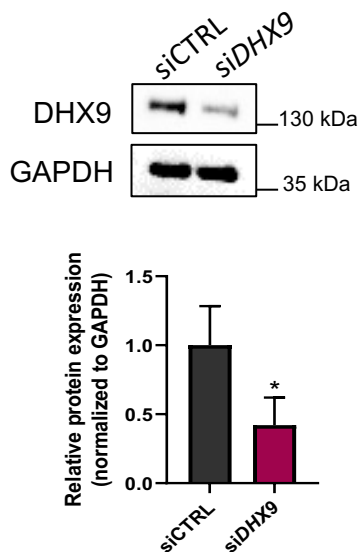

**D**

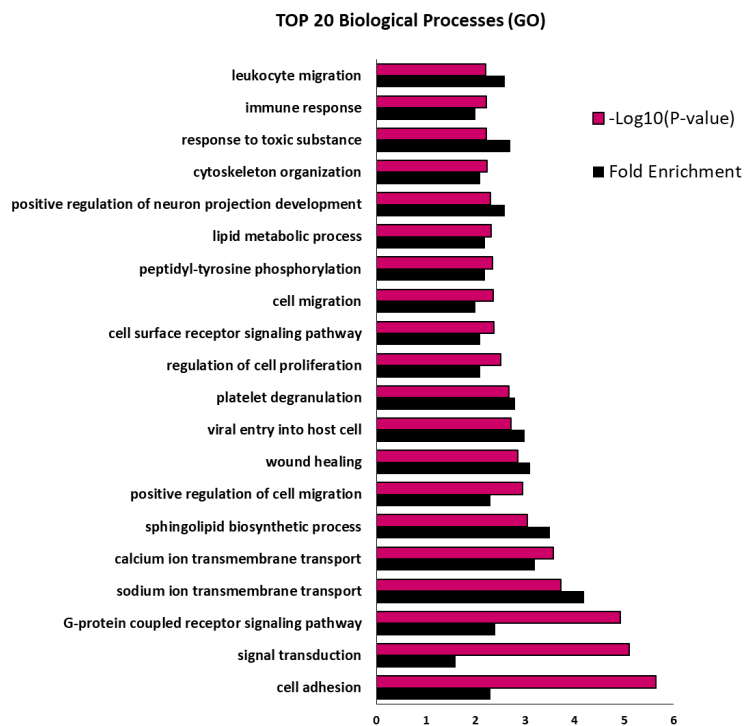

**E**

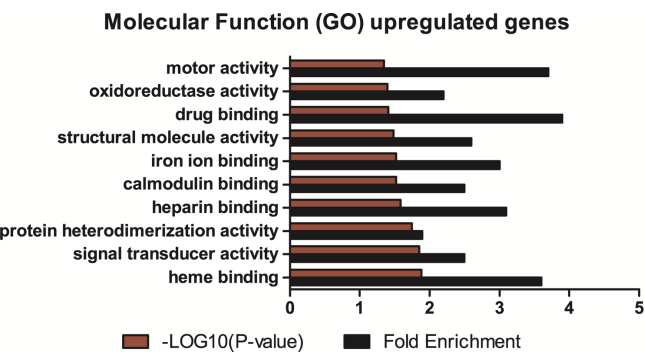

**F**

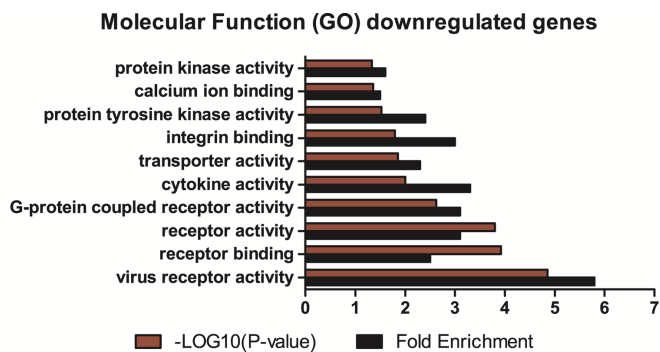

# Supplementary Figure 3. Androgens modulate *DHX9* expression.

**A**

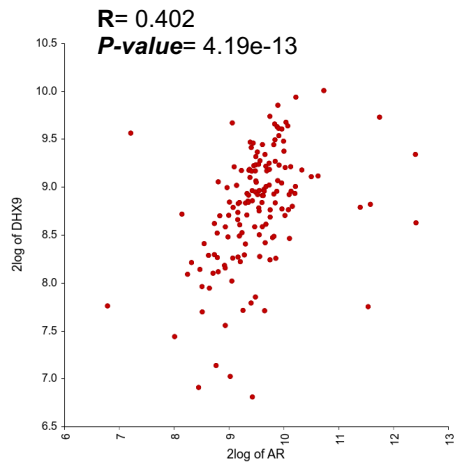

**B**

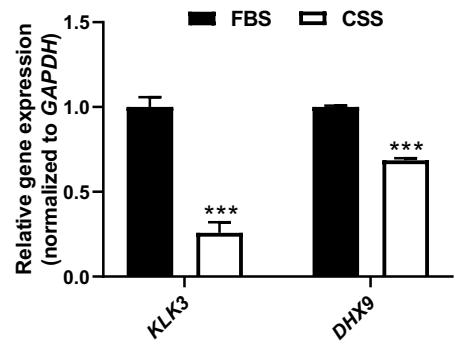

**C**

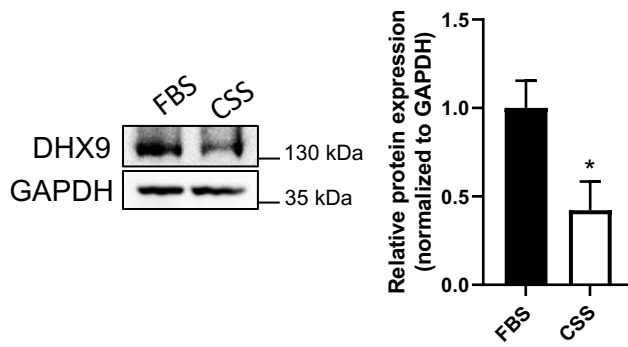

**Supplementary Figure 4. DHX9 and AR act in a functional complex to modulate gene expression.**

**A**

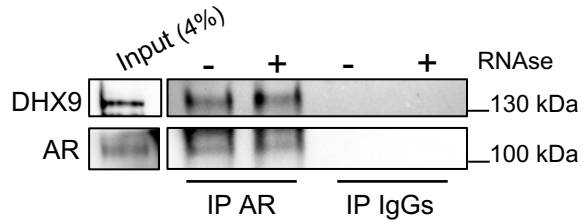

**B**

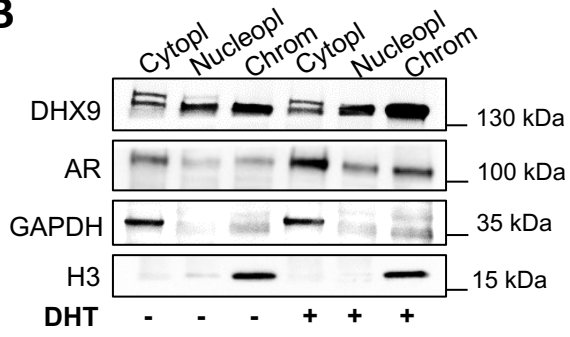

**C**

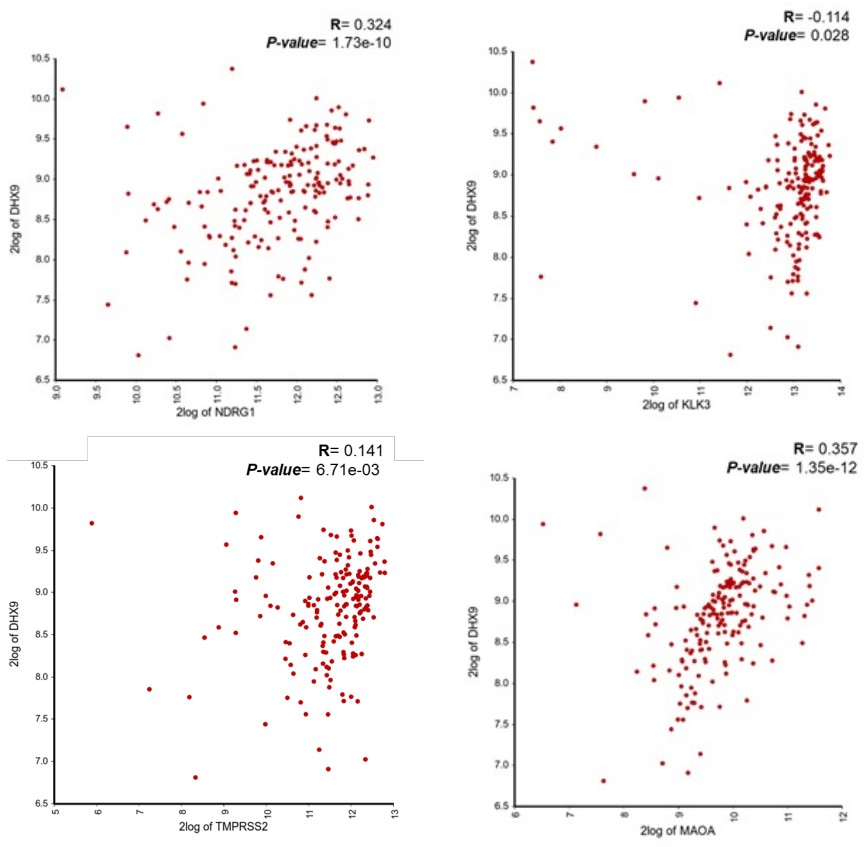

**D**

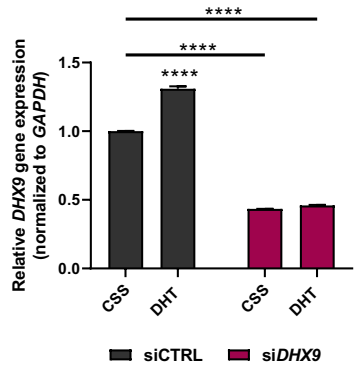

Supplement: 13046_2022_2384_MOESM1_ESM.pdf [file 13046_2022_2384_MOESM1_ESM.pdf]
